# Supplementary material for: Characterization of a probiotic starter culture with anti-Candida activity for Chinese pickle fermentation
Source: Royal Society of Chemistry journal article supplement (doi:10.1039/c9fo01191a), 2019-01-01
Supplement: c9fo01191a1.pdf [file c9fo01191a1.pdf]

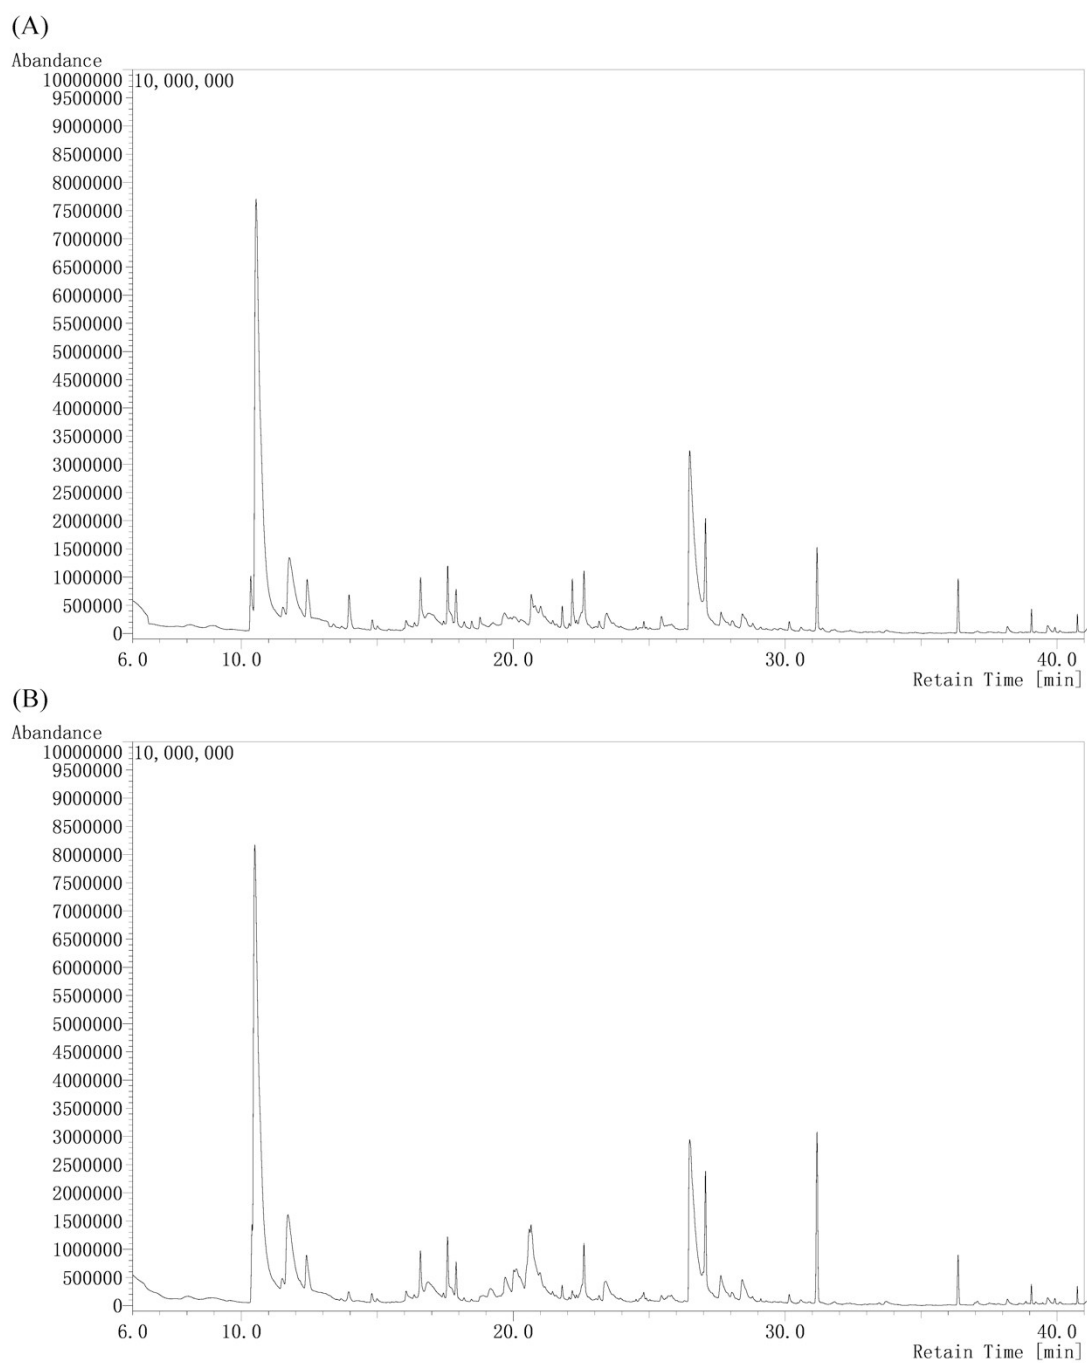

Figure S1 Total ion current chromatogram of Chinese pickle fermented by (A) commercial starter and (B) *L. plantarum* AT4.
