# Supplementary material for: Characterization of a probiotic starter culture with anti-Candida activity for Chinese pickle fermentation
Source: Royal Society of Chemistry journal article supplement (doi:10.1039/c9fo01191a), 2019-01-01
Supplement: c9fo01191a2.pdf [file c9fo01191a2.pdf]

Table S1 Multiple Comparisons Dependent Variable for Figure 2.

| Dependent Variable |    | Mean Difference (I-J) | Std. Error | Sig.    | 95% Confidence Interval |             |
|--------------------|----|-----------------------|------------|---------|-------------------------|-------------|
|                    |    |                       |            |         | Lower Bound             | Upper Bound |
| 1                  | 2  | .53333                | 6.38605    | .934    | -12.4746                | 13.5413     |
|                    | 3  | .90000                | 6.38605    | .889    | -12.1080                | 13.9080     |
|                    | 4  | 1.16667               | 6.38605    | .856    | -11.8413                | 14.1746     |
|                    | 5  | 17.83333*             | 6.38605    | .009    | 4.8254                  | 30.8413     |
|                    | 6  | 67.73333*             | 6.38605    | .000    | 54.7254                 | 80.7413     |
|                    | 7  | 15.30000*             | 6.38605    | .023    | 2.2920                  | 28.3080     |
|                    | 8  | 27.20000*             | 6.38605    | .000    | 14.1920                 | 40.2080     |
|                    | 9  | 32.66667*             | 6.38605    | .000    | 19.6587                 | 45.6746     |
|                    | 10 | 87.76667*             | 6.38605    | .000    | 74.7587                 | 100.7746    |
|                    | 11 | 32.50000*             | 6.38605    | .000    | 19.4920                 | 45.5080     |
|                    | 12 | 50.93333*             | 6.38605    | .000    | 37.9254                 | 63.9413     |
|                    | 13 | 43.86667*             | 6.38605    | .000    | 30.8587                 | 56.8746     |
|                    | 14 | 93.30000*             | 6.38605    | .000    | 80.2920                 | 106.3080    |
|                    | 15 | 47.80000*             | 6.38605    | .000    | 34.7920                 | 60.8080     |
|                    | 16 | 72.06667*             | 6.38605    | .000    | 59.0587                 | 85.0746     |
|                    | 2  | 1                     | -.53333    | 6.38605 | .934                    | -13.5413    |
| 3                  |    | .36667                | 6.38605    | .955    | -12.6413                | 13.3746     |
| 4                  |    | .63333                | 6.38605    | .922    | -12.3746                | 13.6413     |
| 5                  |    | 17.30000*             | 6.38605    | .011    | 4.2920                  | 30.3080     |
| 6                  |    | 67.20000*             | 6.38605    | .000    | 54.1920                 | 80.2080     |
| 7                  |    | 14.76667*             | 6.38605    | .027    | 1.7587                  | 27.7746     |
| 8                  |    | 26.66667*             | 6.38605    | .000    | 13.6587                 | 39.6746     |
| 9                  |    | 32.13333*             | 6.38605    | .000    | 19.1254                 | 45.1413     |
| 10                 |    | 87.23333*             | 6.38605    | .000    | 74.2254                 | 100.2413    |
| 11                 |    | 31.96667*             | 6.38605    | .000    | 18.9587                 | 44.9746     |
| 12                 |    | 50.40000*             | 6.38605    | .000    | 37.3920                 | 63.4080     |
| 13                 |    | 43.33333*             | 6.38605    | .000    | 30.3254                 | 56.3413     |
| 14                 |    | 92.76667*             | 6.38605    | .000    | 79.7587                 | 105.7746    |
| 15                 |    | 47.26667*             | 6.38605    | .000    | 34.2587                 | 60.2746     |
| 16                 |    | 71.53333*             | 6.38605    | .000    | 58.5254                 | 84.5413     |
| 3                  |    | 1                     | -.90000    | 6.38605 | .889                    | -13.9080    |
|                    | 2  | -.36667               | 6.38605    | .955    | -13.3746                | 12.6413     |
|                    | 4  | .26667                | 6.38605    | .967    | -12.7413                | 13.2746     |
|                    | 5  | 16.93333*             | 6.38605    | .012    | 3.9254                  | 29.9413     |
|                    | 6  | 66.83333*             | 6.38605    | .000    | 53.8254                 | 79.8413     |
|                    | 7  | 14.40000*             | 6.38605    | .031    | 1.3920                  | 27.4080     |
|                    | 8  | 26.30000*             | 6.38605    | .000    | 13.2920                 | 39.3080     |
|                    | 9  | 31.76667*             | 6.38605    | .000    | 18.7587                 | 44.7746     |
|                    | 10 | 86.86667*             | 6.38605    | .000    | 73.8587                 | 99.8746     |

|   |    |            |         |      |          |          |
|---|----|------------|---------|------|----------|----------|
|   | 11 | 31.60000*  | 6.38605 | .000 | 18.5920  | 44.6080  |
|   | 12 | 50.03333*  | 6.38605 | .000 | 37.0254  | 63.0413  |
|   | 13 | 42.96667*  | 6.38605 | .000 | 29.9587  | 55.9746  |
|   | 14 | 92.40000*  | 6.38605 | .000 | 79.3920  | 105.4080 |
|   | 15 | 46.90000*  | 6.38605 | .000 | 33.8920  | 59.9080  |
|   | 16 | 71.16667*  | 6.38605 | .000 | 58.1587  | 84.1746  |
| 4 | 1  | -1.16667   | 6.38605 | .856 | -14.1746 | 11.8413  |
|   | 2  | -.63333    | 6.38605 | .922 | -13.6413 | 12.3746  |
|   | 3  | -.26667    | 6.38605 | .967 | -13.2746 | 12.7413  |
|   | 5  | 16.66667*  | 6.38605 | .014 | 3.6587   | 29.6746  |
|   | 6  | 66.56667*  | 6.38605 | .000 | 53.5587  | 79.5746  |
|   | 7  | 14.13333*  | 6.38605 | .034 | 1.1254   | 27.1413  |
|   | 8  | 26.03333*  | 6.38605 | .000 | 13.0254  | 39.0413  |
|   | 9  | 31.50000*  | 6.38605 | .000 | 18.4920  | 44.5080  |
|   | 10 | 86.60000*  | 6.38605 | .000 | 73.5920  | 99.6080  |
|   | 11 | 31.33333*  | 6.38605 | .000 | 18.3254  | 44.3413  |
|   | 12 | 49.76667*  | 6.38605 | .000 | 36.7587  | 62.7746  |
|   | 13 | 42.70000*  | 6.38605 | .000 | 29.6920  | 55.7080  |
|   | 14 | 92.13333*  | 6.38605 | .000 | 79.1254  | 105.1413 |
|   | 15 | 46.63333*  | 6.38605 | .000 | 33.6254  | 59.6413  |
|   | 16 | 70.90000*  | 6.38605 | .000 | 57.8920  | 83.9080  |
| 5 | 1  | -17.83333* | 6.38605 | .009 | -30.8413 | -4.8254  |
|   | 2  | -17.30000* | 6.38605 | .011 | -30.3080 | -4.2920  |
|   | 3  | -16.93333* | 6.38605 | .012 | -29.9413 | -3.9254  |
|   | 4  | -16.66667* | 6.38605 | .014 | -29.6746 | -3.6587  |
|   | 6  | 49.90000*  | 6.38605 | .000 | 36.8920  | 62.9080  |
|   | 7  | -2.53333   | 6.38605 | .694 | -15.5413 | 10.4746  |
|   | 8  | 9.36667    | 6.38605 | .152 | -3.6413  | 22.3746  |
|   | 9  | 14.83333*  | 6.38605 | .027 | 1.8254   | 27.8413  |
|   | 10 | 69.93333*  | 6.38605 | .000 | 56.9254  | 82.9413  |
|   | 11 | 14.66667*  | 6.38605 | .028 | 1.6587   | 27.6746  |
|   | 12 | 33.10000*  | 6.38605 | .000 | 20.0920  | 46.1080  |
|   | 13 | 26.03333*  | 6.38605 | .000 | 13.0254  | 39.0413  |
|   | 14 | 75.46667*  | 6.38605 | .000 | 62.4587  | 88.4746  |
|   | 15 | 29.96667*  | 6.38605 | .000 | 16.9587  | 42.9746  |
|   | 16 | 54.23333*  | 6.38605 | .000 | 41.2254  | 67.2413  |
| 6 | 1  | -67.73333* | 6.38605 | .000 | -80.7413 | -54.7254 |
|   | 2  | -67.20000* | 6.38605 | .000 | -80.2080 | -54.1920 |
|   | 3  | -66.83333* | 6.38605 | .000 | -79.8413 | -53.8254 |
|   | 4  | -66.56667* | 6.38605 | .000 | -79.5746 | -53.5587 |
|   | 5  | -49.90000* | 6.38605 | .000 | -62.9080 | -36.8920 |
|   | 7  | -52.43333* | 6.38605 | .000 | -65.4413 | -39.4254 |
|   | 8  | -40.53333* | 6.38605 | .000 | -53.5413 | -27.5254 |

|   |    |            |         |      |          |          |
|---|----|------------|---------|------|----------|----------|
|   | 9  | -35.06667* | 6.38605 | .000 | -48.0746 | -22.0587 |
|   | 10 | 20.03333*  | 6.38605 | .004 | 7.0254   | 33.0413  |
|   | 11 | -35.23333* | 6.38605 | .000 | -48.2413 | -22.2254 |
|   | 12 | -16.80000* | 6.38605 | .013 | -29.8080 | -3.7920  |
|   | 13 | -23.86667* | 6.38605 | .001 | -36.8746 | -10.8587 |
|   | 14 | 25.56667*  | 6.38605 | .000 | 12.5587  | 38.5746  |
|   | 15 | -19.93333* | 6.38605 | .004 | -32.9413 | -6.9254  |
|   | 16 | 4.33333    | 6.38605 | .502 | -8.6746  | 17.3413  |
| 7 | 1  | -15.30000* | 6.38605 | .023 | -28.3080 | -2.2920  |
|   | 2  | -14.76667* | 6.38605 | .027 | -27.7746 | -1.7587  |
|   | 3  | -14.40000* | 6.38605 | .031 | -27.4080 | -1.3920  |
|   | 4  | -14.13333* | 6.38605 | .034 | -27.1413 | -1.1254  |
|   | 5  | 2.53333    | 6.38605 | .694 | -10.4746 | 15.5413  |
|   | 6  | 52.43333*  | 6.38605 | .000 | 39.4254  | 65.4413  |
|   | 8  | 11.90000   | 6.38605 | .072 | -1.1080  | 24.9080  |
|   | 9  | 17.36667*  | 6.38605 | .010 | 4.3587   | 30.3746  |
|   | 10 | 72.46667*  | 6.38605 | .000 | 59.4587  | 85.4746  |
|   | 11 | 17.20000*  | 6.38605 | .011 | 4.1920   | 30.2080  |
|   | 12 | 35.63333*  | 6.38605 | .000 | 22.6254  | 48.6413  |
|   | 13 | 28.56667*  | 6.38605 | .000 | 15.5587  | 41.5746  |
|   | 14 | 78.00000*  | 6.38605 | .000 | 64.9920  | 91.0080  |
|   | 15 | 32.50000*  | 6.38605 | .000 | 19.4920  | 45.5080  |
|   | 16 | 56.76667*  | 6.38605 | .000 | 43.7587  | 69.7746  |
| 8 | 1  | -27.20000* | 6.38605 | .000 | -40.2080 | -14.1920 |
|   | 2  | -26.66667* | 6.38605 | .000 | -39.6746 | -13.6587 |
|   | 3  | -26.30000* | 6.38605 | .000 | -39.3080 | -13.2920 |
|   | 4  | -26.03333* | 6.38605 | .000 | -39.0413 | -13.0254 |
|   | 5  | -9.36667   | 6.38605 | .152 | -22.3746 | 3.6413   |
|   | 6  | 40.53333*  | 6.38605 | .000 | 27.5254  | 53.5413  |
|   | 7  | -11.90000  | 6.38605 | .072 | -24.9080 | 1.1080   |
|   | 9  | 5.46667    | 6.38605 | .398 | -7.5413  | 18.4746  |
|   | 10 | 60.56667*  | 6.38605 | .000 | 47.5587  | 73.5746  |
|   | 11 | 5.30000    | 6.38605 | .413 | -7.7080  | 18.3080  |
|   | 12 | 23.73333*  | 6.38605 | .001 | 10.7254  | 36.7413  |
|   | 13 | 16.66667*  | 6.38605 | .014 | 3.6587   | 29.6746  |
|   | 14 | 66.10000*  | 6.38605 | .000 | 53.0920  | 79.1080  |
|   | 15 | 20.60000*  | 6.38605 | .003 | 7.5920   | 33.6080  |
|   | 16 | 44.86667*  | 6.38605 | .000 | 31.8587  | 57.8746  |
| 9 | 1  | -32.66667* | 6.38605 | .000 | -45.6746 | -19.6587 |
|   | 2  | -32.13333* | 6.38605 | .000 | -45.1413 | -19.1254 |
|   | 3  | -31.76667* | 6.38605 | .000 | -44.7746 | -18.7587 |
|   | 4  | -31.50000* | 6.38605 | .000 | -44.5080 | -18.4920 |
|   | 5  | -14.83333* | 6.38605 | .027 | -27.8413 | -1.8254  |

|    |    |            |         |      |           |          |
|----|----|------------|---------|------|-----------|----------|
|    | 6  | 35.06667*  | 6.38605 | .000 | 22.0587   | 48.0746  |
|    | 7  | -17.36667* | 6.38605 | .010 | -30.3746  | -4.3587  |
|    | 8  | -5.46667   | 6.38605 | .398 | -18.4746  | 7.5413   |
|    | 10 | 55.10000*  | 6.38605 | .000 | 42.0920   | 68.1080  |
|    | 11 | -.16667    | 6.38605 | .979 | -13.1746  | 12.8413  |
|    | 12 | 18.26667*  | 6.38605 | .007 | 5.2587    | 31.2746  |
|    | 13 | 11.20000   | 6.38605 | .089 | -1.8080   | 24.2080  |
|    | 14 | 60.63333*  | 6.38605 | .000 | 47.6254   | 73.6413  |
|    | 15 | 15.13333*  | 6.38605 | .024 | 2.1254    | 28.1413  |
|    | 16 | 39.40000*  | 6.38605 | .000 | 26.3920   | 52.4080  |
| 10 | 1  | -87.76667* | 6.38605 | .000 | -100.7746 | -74.7587 |
|    | 2  | -87.23333* | 6.38605 | .000 | -100.2413 | -74.2254 |
|    | 3  | -86.86667* | 6.38605 | .000 | -99.8746  | -73.8587 |
|    | 4  | -86.60000* | 6.38605 | .000 | -99.6080  | -73.5920 |
|    | 5  | -69.93333* | 6.38605 | .000 | -82.9413  | -56.9254 |
|    | 6  | -20.03333* | 6.38605 | .004 | -33.0413  | -7.0254  |
|    | 7  | -72.46667* | 6.38605 | .000 | -85.4746  | -59.4587 |
|    | 8  | -60.56667* | 6.38605 | .000 | -73.5746  | -47.5587 |
|    | 9  | -55.10000* | 6.38605 | .000 | -68.1080  | -42.0920 |
|    | 11 | -55.26667* | 6.38605 | .000 | -68.2746  | -42.2587 |
|    | 12 | -36.83333* | 6.38605 | .000 | -49.8413  | -23.8254 |
|    | 13 | -43.90000* | 6.38605 | .000 | -56.9080  | -30.8920 |
|    | 14 | 5.53333    | 6.38605 | .393 | -7.4746   | 18.5413  |
|    | 15 | -39.96667* | 6.38605 | .000 | -52.9746  | -26.9587 |
|    | 16 | -15.70000* | 6.38605 | .020 | -28.7080  | -2.6920  |
| 11 | 1  | -32.50000* | 6.38605 | .000 | -45.5080  | -19.4920 |
|    | 2  | -31.96667* | 6.38605 | .000 | -44.9746  | -18.9587 |
|    | 3  | -31.60000* | 6.38605 | .000 | -44.6080  | -18.5920 |
|    | 4  | -31.33333* | 6.38605 | .000 | -44.3413  | -18.3254 |
|    | 5  | -14.66667* | 6.38605 | .028 | -27.6746  | -1.6587  |
|    | 6  | 35.23333*  | 6.38605 | .000 | 22.2254   | 48.2413  |
|    | 7  | -17.20000* | 6.38605 | .011 | -30.2080  | -4.1920  |
|    | 8  | -5.30000   | 6.38605 | .413 | -18.3080  | 7.7080   |
|    | 9  | .16667     | 6.38605 | .979 | -12.8413  | 13.1746  |
|    | 10 | 55.26667*  | 6.38605 | .000 | 42.2587   | 68.2746  |
|    | 12 | 18.43333*  | 6.38605 | .007 | 5.4254    | 31.4413  |
|    | 13 | 11.36667   | 6.38605 | .085 | -1.6413   | 24.3746  |
|    | 14 | 60.80000*  | 6.38605 | .000 | 47.7920   | 73.8080  |
|    | 15 | 15.30000*  | 6.38605 | .023 | 2.2920    | 28.3080  |
|    | 16 | 39.56667*  | 6.38605 | .000 | 26.5587   | 52.5746  |
| 12 | 1  | -50.93333* | 6.38605 | .000 | -63.9413  | -37.9254 |
|    | 2  | -50.40000* | 6.38605 | .000 | -63.4080  | -37.3920 |
|    | 3  | -50.03333* | 6.38605 | .000 | -63.0413  | -37.0254 |

|    |    |            |         |      |           |          |
|----|----|------------|---------|------|-----------|----------|
|    | 4  | -49.76667* | 6.38605 | .000 | -62.7746  | -36.7587 |
|    | 5  | -33.10000* | 6.38605 | .000 | -46.1080  | -20.0920 |
|    | 6  | 16.80000*  | 6.38605 | .013 | 3.7920    | 29.8080  |
|    | 7  | -35.63333* | 6.38605 | .000 | -48.6413  | -22.6254 |
|    | 8  | -23.73333* | 6.38605 | .001 | -36.7413  | -10.7254 |
|    | 9  | -18.26667* | 6.38605 | .007 | -31.2746  | -5.2587  |
|    | 10 | 36.83333*  | 6.38605 | .000 | 23.8254   | 49.8413  |
|    | 11 | -18.43333* | 6.38605 | .007 | -31.4413  | -5.4254  |
|    | 13 | -7.06667   | 6.38605 | .277 | -20.0746  | 5.9413   |
|    | 14 | 42.36667*  | 6.38605 | .000 | 29.3587   | 55.3746  |
|    | 15 | -3.133333  | 6.38605 | .627 | -16.1413  | 9.8746   |
|    | 16 | 21.13333*  | 6.38605 | .002 | 8.1254    | 34.1413  |
| 13 | 1  | -43.86667* | 6.38605 | .000 | -56.8746  | -30.8587 |
|    | 2  | -43.33333* | 6.38605 | .000 | -56.3413  | -30.3254 |
|    | 3  | -42.96667* | 6.38605 | .000 | -55.9746  | -29.9587 |
|    | 4  | -42.70000* | 6.38605 | .000 | -55.7080  | -29.6920 |
|    | 5  | -26.03333* | 6.38605 | .000 | -39.0413  | -13.0254 |
|    | 6  | 23.86667*  | 6.38605 | .001 | 10.8587   | 36.8746  |
|    | 7  | -28.56667* | 6.38605 | .000 | -41.5746  | -15.5587 |
|    | 8  | -16.66667* | 6.38605 | .014 | -29.6746  | -3.6587  |
|    | 9  | -11.20000  | 6.38605 | .089 | -24.2080  | 1.8080   |
|    | 10 | 43.90000*  | 6.38605 | .000 | 30.8920   | 56.9080  |
|    | 11 | -11.36667  | 6.38605 | .085 | -24.3746  | 1.6413   |
|    | 12 | 7.06667    | 6.38605 | .277 | -5.9413   | 20.0746  |
|    | 14 | 49.43333*  | 6.38605 | .000 | 36.4254   | 62.4413  |
|    | 15 | 3.933333   | 6.38605 | .542 | -9.0746   | 16.9413  |
|    | 16 | 28.20000*  | 6.38605 | .000 | 15.1920   | 41.2080  |
| 14 | 1  | -93.30000* | 6.38605 | .000 | -106.3080 | -80.2920 |
|    | 2  | -92.76667* | 6.38605 | .000 | -105.7746 | -79.7587 |
|    | 3  | -92.40000* | 6.38605 | .000 | -105.4080 | -79.3920 |
|    | 4  | -92.13333* | 6.38605 | .000 | -105.1413 | -79.1254 |
|    | 5  | -75.46667* | 6.38605 | .000 | -88.4746  | -62.4587 |
|    | 6  | -25.56667* | 6.38605 | .000 | -38.5746  | -12.5587 |
|    | 7  | -78.00000* | 6.38605 | .000 | -91.0080  | -64.9920 |
|    | 8  | -66.10000* | 6.38605 | .000 | -79.1080  | -53.0920 |
|    | 9  | -60.63333* | 6.38605 | .000 | -73.6413  | -47.6254 |
|    | 10 | -5.533333  | 6.38605 | .393 | -18.5413  | 7.4746   |
|    | 11 | -60.80000* | 6.38605 | .000 | -73.8080  | -47.7920 |
|    | 12 | -42.36667* | 6.38605 | .000 | -55.3746  | -29.3587 |
|    | 13 | -49.43333* | 6.38605 | .000 | -62.4413  | -36.4254 |
|    | 15 | -45.50000* | 6.38605 | .000 | -58.5080  | -32.4920 |
|    | 16 | -21.23333* | 6.38605 | .002 | -34.2413  | -8.2254  |
| 15 | 1  | -47.80000* | 6.38605 | .000 | -60.8080  | -34.7920 |

|    |    |            |         |      |          |          |
|----|----|------------|---------|------|----------|----------|
|    | 2  | -47.26667* | 6.38605 | .000 | -60.2746 | -34.2587 |
|    | 3  | -46.90000* | 6.38605 | .000 | -59.9080 | -33.8920 |
|    | 4  | -46.63333* | 6.38605 | .000 | -59.6413 | -33.6254 |
|    | 5  | -29.96667* | 6.38605 | .000 | -42.9746 | -16.9587 |
|    | 6  | 19.93333*  | 6.38605 | .004 | 6.9254   | 32.9413  |
|    | 7  | -32.50000* | 6.38605 | .000 | -45.5080 | -19.4920 |
|    | 8  | -20.60000* | 6.38605 | .003 | -33.6080 | -7.5920  |
|    | 9  | -15.13333* | 6.38605 | .024 | -28.1413 | -2.1254  |
|    | 10 | 39.96667*  | 6.38605 | .000 | 26.9587  | 52.9746  |
|    | 11 | -15.30000* | 6.38605 | .023 | -28.3080 | -2.2920  |
|    | 12 | 3.133333   | 6.38605 | .627 | -9.8746  | 16.1413  |
|    | 13 | -3.933333  | 6.38605 | .542 | -16.9413 | 9.0746   |
|    | 14 | 45.50000*  | 6.38605 | .000 | 32.4920  | 58.5080  |
|    | 16 | 24.26667*  | 6.38605 | .001 | 11.2587  | 37.2746  |
| 16 | 1  | -72.06667* | 6.38605 | .000 | -85.0746 | -59.0587 |
|    | 2  | -71.53333* | 6.38605 | .000 | -84.5413 | -58.5254 |
|    | 3  | -71.16667* | 6.38605 | .000 | -84.1746 | -58.1587 |
|    | 4  | -70.90000* | 6.38605 | .000 | -83.9080 | -57.8920 |
|    | 5  | -54.23333* | 6.38605 | .000 | -67.2413 | -41.2254 |
|    | 6  | -4.333333  | 6.38605 | .502 | -17.3413 | 8.6746   |
|    | 7  | -56.76667* | 6.38605 | .000 | -69.7746 | -43.7587 |
|    | 8  | -44.86667* | 6.38605 | .000 | -57.8746 | -31.8587 |
|    | 9  | -39.40000* | 6.38605 | .000 | -52.4080 | -26.3920 |
|    | 10 | 15.70000*  | 6.38605 | .020 | 2.6920   | 28.7080  |
|    | 11 | -39.56667* | 6.38605 | .000 | -52.5746 | -26.5587 |
|    | 12 | -21.13333* | 6.38605 | .002 | -34.1413 | -8.1254  |
|    | 13 | -28.20000* | 6.38605 | .000 | -41.2080 | -15.1920 |
|    | 14 | 21.23333*  | 6.38605 | .002 | 8.2254   | 34.2413  |
|    | 15 | -24.26667* | 6.38605 | .001 | -37.2746 | -11.2587 |

\*. The mean difference is significant at the 0.05 level.

1, AT4-0d; 2, AT6-0d; 3, AT28-0d; 4, CICC 20764-0d;

5, AT4-10d; 6, AT6-10d; 7, AT28-10d; 8, CICC 20764-10d;

9, AT4-20d; 10, AT6-20d; 11, AT28-20d; 12, CICC 20764-20d;

13, AT4-30d; 14, AT6-30d; 15, AT28-30d; 16, CICC 20764-30d.
